# Supplementary material for: Kinetics of Anti-SARS-CoV-2 Antibody Responses 3 Months Post Complete Vaccination with BNT162b2; A Prospective Study in 283 Health Workers
Source: MDPI journal article supplement (doi:10.3390/cells10081942), 2021-07-30
Supplement: s1 [file s1]

# Supplementary Material: Kinetics of anti-SARS-CoV-2 antibody responses 3 months post complete vaccination with BNT162b2; a prospective study in 283 health workers

Evangelos Terpos<sup>1#</sup>, Ioannis P. Trougakos<sup>2#</sup>, Vangelis Karalis<sup>3</sup>, Ioannis Ntanas-Stathopoulos<sup>1</sup>, Sentiljana Gumeni<sup>2</sup>, Filia Apostolakou<sup>4</sup>, Aimilia D. Sklirou<sup>2</sup>, Maria Gavriatopoulou<sup>1</sup>, Stamatia Skourti<sup>1</sup>, Efstathios Kastitis<sup>1</sup>, Eleni Korompoki<sup>1</sup>, Ioannis Papassotiriou<sup>4</sup> and Meletios A. Dimopoulos<sup>1</sup>

*#Equal contribution as first authors*

## A. Normality testing:

### A1. Nabs levels

**Table S1.** Normality testing of the Nabs levels on all measurement days.

|      | Kolmogorov-Smirnov |         | Shapiro-Wilk |         |
|------|--------------------|---------|--------------|---------|
|      | Statistic          | p-value | Statistic    | p-value |
| D1   | 0.103              | 0       | 0.888        | 0       |
| D8   | 0.166              | 0       | 0.703        | 0       |
| D22  | 0.047              | 0.02    | 0.988        | 0.034   |
| D36  | 0.325              | 0       | 0.329        | 0       |
| D50  | 0.308              | 0       | 0.381        | 0       |
| D111 | 0.182              | 0       | 0.777        | 0       |

**Table S2.** Normality testing of the Rate of change (in case of the Nabs levels) on all measurement days.

|                       | Kolmogorov-Smirnov |         | Shapiro-Wilk |       |
|-----------------------|--------------------|---------|--------------|-------|
|                       | Statistic          | p-value | Statistic    | Sig.  |
| Rate of change 1_8    | 0.222              | 0       | 0.596        | 0     |
| Rate of change 8_22   | 0.15               | 0.02    | 0.99         | 0.017 |
| Rate of change 22_36  | 0.149              | 0.02    | 0.988        | 0.046 |
| Rate of change 50_111 | 0.182              | 0       | 0.8          | 0     |
| Rate of change 36_111 | 0.18               | 0       | 0.806        | 0     |

## A2. Anti-S-RBDs

**Table S3.** Normality testing of the anti-S-RBDs levels on all measurement days.

|        | Kolmogorov-Smirnov |         | Shapiro-Wilk |         |
|--------|--------------------|---------|--------------|---------|
|        | Statistic          | p-value | Statistic    | p-value |
| R_D1   | 0.508              | 0       | 0.08         | 0       |
| R_D8   | 0.54               | 0       | 0.174        | 0       |
| R_D22  | 0.402              | 0       | 0.275        | 0       |
| R_D36  | 0.277              | 0       | 0.791        | 0       |
| R_D50  | 0.162              | 0       | 0.892        | 0       |
| R_D111 | 0.156              | 0       | 0.884        | 0       |

**Table S4.** Normality testing of the Rate of change (in case of the anti-S-RBDs levels) on all measurement days.

|                       | Kolmogorov-Smirnov |         | Shapiro-Wilk |         |
|-----------------------|--------------------|---------|--------------|---------|
|                       | Statistic          | p-value | Statistic    | p-value |
| Rate of change 1_8    | 0.54               | 0       | 0.175        | 0       |
| Rate of change 8_22   | 0.374              | 0       | 0.213        | 0       |
| Rate of change 22_36  | 0.222              | 0       | 0.843        | 0       |
| Rate of change 1_36   | 0.247              | 0       | 0.798        | 0       |
| Rate of change 36_50  | 0.141              | 0       | 0.901        | 0       |
| Rate of change 50_111 | 0.095              | 0       | 0.956        | 0       |
| Rate of change 36_111 | 0.11               | 0       | 0.957        | 0       |

## B. Nabs comparison among days 36, 50, 111

**Table S5.** Wilcoxon signed rank test results for the comparisons of Nabs levels.

|                | <b>D36 - D111</b> | <b>D50 - D111</b> | <b>D36 - D50</b> |
|----------------|-------------------|-------------------|------------------|
| <b>Z score</b> | -12.843           | -12.814           | -9.2             |
| <b>p-value</b> | < 0.001           | < 0.001           | < 0.001          |

## C. Anti-S-RBDs among days 36, 50, 111

**Table S6.** Wilcoxon signed rank test results for the comparisons of rate of change (in case of the Nabs levels).

|                | <b>R_D1 - R_D8</b> | <b>R_D8 - R_D22</b> | <b>R_D22 - R_D36</b> | <b>R_D36 - R_D50</b> | <b>R_D50 - R_D111</b> |
|----------------|--------------------|---------------------|----------------------|----------------------|-----------------------|
| <b>Z score</b> | -2.38              | -12.976             | -13.034              | -11.441              | -12.032               |
| <b>p-value</b> | 0.017              | < 0.001             | < 0.001              | < 0.001              | < 0.001               |

## D. Nabs per age group among days 36, 50, 111

**Table S7.** Wilcoxon signed rank test results for the comparisons of anti-S-RBDs levels.

|                | <b>D36</b> | <b>D50</b> | <b>D111</b> |
|----------------|------------|------------|-------------|
| Wilcoxon       | 14886      | 16939.5    | 13564       |
| Z score        | -2.997     | -3.244     | -3.12       |
| <b>p-value</b> | 0.003      | 0.001      | 0.002       |

## E. Anti-S-RBDs per age group among days 36, 50, 111

**Table S8.** Wilcoxon signed rank test results for the comparisons of rate of change (in case of the anti-S-RBDs levels).

|                | <b>R_D1</b> | <b>R_D8</b> | <b>R_D22</b> | <b>R_D36</b> | <b>R_D50</b> | <b>R_D111</b> |
|----------------|-------------|-------------|--------------|--------------|--------------|---------------|
| Wilcoxon       | 19377.5     | 17206       | 12447        | 14750        | 16116        | 10542         |
| Z score        | -0.45       | -0.289      | -3.074       | -2.092       | -1.936       | -2.331        |
| <b>p-value</b> | 0.653       | 0.773       | 0.002        | 0.036        | 0.053        | 0.02          |

## F. Principal Component Analysis

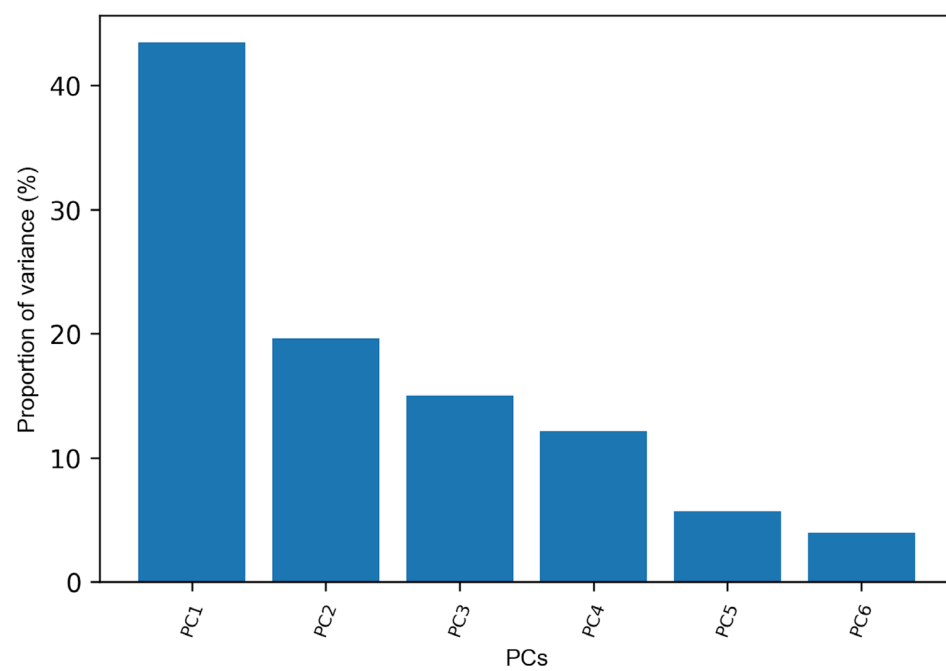

**Figure S1.** Scree plot for the final PCA model showing the proportion of variance explained by each component.

## G. Relationship between adverse events and Nabs (or anti-S-RBDs) levels

### G1. Nabs vs. Adverse events

**Table S9.** Association between adverse events and Nabs levels. The Mann-Whitney test results indicate no significant difference between the group of subjects experiencing an adverse event and the group of people without any adverse events.

|                     | <b>D1</b> | <b>D8</b> | <b>D22</b> | <b>D36</b> | <b>D50</b> | <b>D111</b> |
|---------------------|-----------|-----------|------------|------------|------------|-------------|
| <b>Mann-Whitney</b> | 7710.5    | 7285      | 8507       | 8251.5     | 9708       | 7645.5      |
| <b>Z score</b>      | -1.837    | -1.233    | -0.46      | -1.282     | -0.439     | -1.426      |
| <b>p-value</b>      | 0.066     | 0.217     | 0.646      | 0.2        | 0.661      | 0.154       |

### G2. Rate of Change of Nabs vs. Adverse events

**Table S10.** Association between adverse events and rate of change in the case of Nabs levels. The results of the Mann-Whitney test show no significant difference between the group of subjects with an adverse event and the group of subjects without an adverse event.

|                     | <b>Rate of change1_8</b> | <b>Rate of change8_22</b> | <b>Rate of change22_36</b> | <b>Rate of change1_36</b> | <b>Rate of change36_50</b> |
|---------------------|--------------------------|---------------------------|----------------------------|---------------------------|----------------------------|
| <b>Mann-Whitney</b> | 7473                     | 6597.5                    | 7209                       | 7005                      | 7362                       |
| <b>Z score</b>      | -0.587                   | -1.831                    | -0.954                     | -1.107                    | -1.746                     |
| <b>p-value</b>      | 0.557                    | 0.067                     | 0.34                       | 0.268                     | 0.081                      |

### G3. Anti-S-RBDs vs. Adverse events

**Table S11.** Association between adverse events and anti-S-RBDs levels. The results of the Mann-Whitney test show no significant difference between the group of subjects with an adverse event and the group of subjects without an adverse event.

|                     | <b>R_D1</b> | <b>R_D8</b> | <b>R_D22</b> | <b>R_D36</b> | <b>R_D50</b> | <b>R_D111</b> |
|---------------------|-------------|-------------|--------------|--------------|--------------|---------------|
| <b>Mann-Whitney</b> | 7878        | 7513        | 7555.5       | 8144         | 8612         | 6123.5        |
| <b>Z score</b>      | -1.848      | -0.989      | -0.69        | -0.709       | -0.785       | -1.048        |
| <b>p-value</b>      | 0.065       | 0.322       | 0.49         | 0.479        | 0.433        | 0.295         |

### G4. Rate of Change of Anti-S-RBDs vs. Adverse events

**Table S12.** Association between adverse events and rate of change in the case of anti-S-RBDs levels. The results of the Mann-Whitney test show no significant difference between the group of subjects with an adverse event and the group of subjects without an adverse event.

|                     | <b>Rate of change1_8</b> | <b>Rate of change8_22</b> | <b>Rate of change22_36</b> | <b>Rate of change1_36</b> | <b>Rate of change36_50</b> | <b>Rate of change50_111</b> | <b>Rate of change36_111</b> |
|---------------------|--------------------------|---------------------------|----------------------------|---------------------------|----------------------------|-----------------------------|-----------------------------|
| <b>Mann-Whitney</b> | 6888                     | 6028                      | 5993.5                     | 6693                      | 7226                       | 6032                        | 5474                        |
| <b>Z score</b>      | -0.57                    | -1.257                    | -1.474                     | -0.486                    | -0.487                     | -0.47                       | -0.205                      |
| <b>p-value</b>      | 0.568                    | 0.209                     | 0.14                       | 0.627                     | 0.626                      | 0.639                       | 0.837                       |
